## Review

# *Platycarya strobilacea* Sieb. et Zucc.: a review of its traditional uses, botany, phytochemistry, pharmacology and toxicology

Peiyuan Zhao<sup>1</sup>, Lizhu Han<sup>1</sup>, Yunlan Wang<sup>1</sup>, Jinqing Qiu<sup>1</sup>, Xinbo Zhang<sup>1</sup>, Zhishu Tang<sup>1</sup>, Xi Duan<sup>2</sup> and Xiao Song<sup>1,\*</sup>

<sup>1</sup>School of Pharmacy, Shaanxi University of Chinese Medicine, Xianyang, China

<sup>2</sup>Affiliated Hospital, Shaanxi University of Chinese Medicine, Xianyang, China

\*Correspondence: Xiao Song, School of Pharmacy, Shaanxi University of Chinese Medicine, Xianyang 712046, China. Email: [song-xiaoyao@163.com](mailto:song-xiaoyao@163.com)

### Abstract

**Objectives** *Platycarya strobilacea* Sieb. et Zucc. is the dry infructescence of *P. strobilacea*, a Juglandaceae plant and is a traditional Chinese medicine with great development potential and utilization value. This study summarizes the research progress on the traditional uses, botany, phytochemistry, extraction methods, pharmacology and toxicology of *Platycarya strobilacea* Sieb. et Zucc., and provides potential therapeutic uses and drug development prospects for this plant.

**Key findings** Phytochemical studies showed that this plant mainly contains volatile constituents, phenols, terpenoids and a carbohydrate. The pharmacological activity of *Platycarya strobilacea* Sieb. et Zucc. includes antibacterial and anti-inflammatory effects, anti-tumour effects and antioxidant effects. This plant is especially effective in the treatment of allergic rhinitis and chronic sinusitis.

**Summary** In this review, the phytochemistry and pharmacological effects of *Platycarya strobilacea* Sieb. et Zucc. are described in detail, which will have guiding significance for the future development of this drug.

**Keywords:** *Platycarya strobilacea* Sieb. et Zucc.; traditional uses; botany; phytochemistry; pharmacology

### Introduction

*Platycarya strobilacea* Sieb. et Zucc. (PSZ) is the dry infructescence of *P. strobilacea*, a Juglandaceae plant, which is distributed in East China, Central China, South China, Southwest China, Gansu and Shaanxi.<sup>[1]</sup> It has a pungent warm taste, and has the effects of relieving qi, dispelling wind, relieving swelling, pain, dryness, dampness and kill insects. It is mainly used to treat symptoms such as nasal abyss, chest distension, abdominal pain, carbuncle swelling, wet sores, muscle and bone pain.<sup>[1]</sup> PSZ is used as the main medicine in Xiangju tablets to treat allergic rhinitis and chronic sinusitis,<sup>[2, 3]</sup> and its decoction is generally used to treat rhinitis, sinusitis and acute upper respiratory tract infections.<sup>[4, 5]</sup> The known components of PSZ mainly include volatile constituents, phenols, terpenoids and a carbohydrate,<sup>[6–9]</sup> and has antibacterial, anti-inflammatory, anti-tumour, antioxidant, anti-virus and other pharmacological effects.<sup>[9, 10]</sup>

At present, research on PSZ is still in its infancy. There are few studies on its toxicology and pharmacokinetics, and the research direction of this plant in the future is unclear. Therefore, in this study, research progress on

the traditional uses, botany, phytochemistry, extraction methods, pharmacology and toxicology of PSZ are reviewed and its development prospects are discussed. It is hoped that these findings will reflect the importance of PSZ, and provide some guidance for the future development of this plant (Figure 1).

### Methods

To understand the present research progress on PSZ, articles related to the phytochemistry, extraction methods, pharmacology and toxicology of PSZ were collected from CNKI, Google Scholar, PubMed, Web of Science, SpringerLink, Wiley, Wanfang Database and Baidu Scholar. The information on botany and traditional uses was obtained from books such as *The Great Dictionary of Traditional Chinese Medicine*<sup>[1]</sup> and *A textual Research on the name and reality of plants*.<sup>[9]</sup> We used keywords to search for information related to PSZ on these websites, including botany, phytochemistry, extraction methods, pharmacology and toxicology. The search identified a total of 76 articles, most of which were related to phytochemistry and pharmacology.

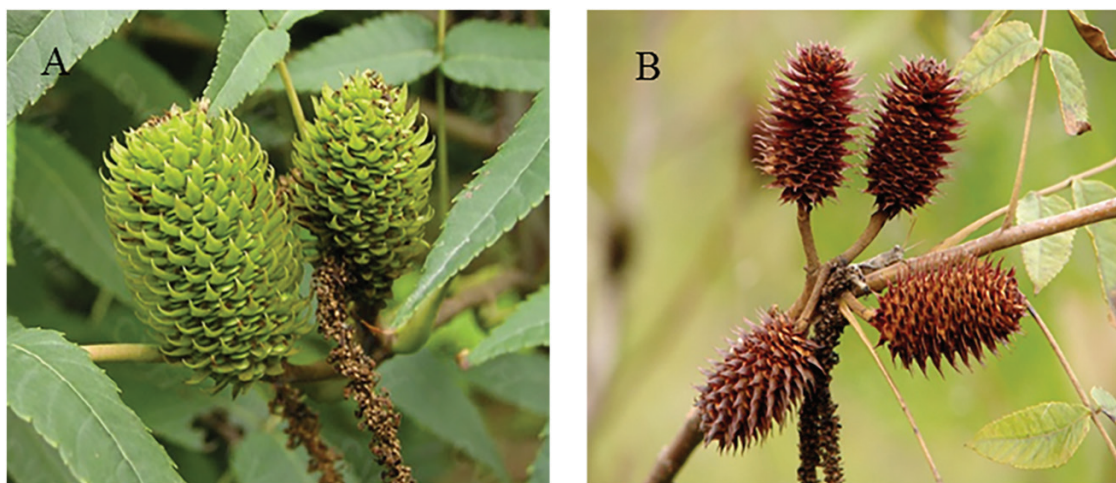

**Figure 1** (A) the infructescence of immature *Platycarya strobilacea* Sieb. et Zucc.; (B) the infructescence of mature *Platycarya strobilacea* Sieb. et Zucc.

## Results

### Traditional Uses

PSZ has a wide range of biological and pharmacological activity and has a long history in China. Fossil records indicate that the genus was widely distributed in all continents of the Northern Hemisphere at the beginning of the Tertiary period, but after the Quaternary Ice Age, it became extinct in most places and survived only in East Asia, a plant that is endemic to East Asia.<sup>[11]</sup> The original PSZ plant was first included in the *A textual Research on the name and reality of plants*,<sup>[9]</sup> and was mainly used for relieving qi and dispersing phlegm. In *The Great Dictionary of Traditional Chinese Medicine*,<sup>[1]</sup> PSZ was used to treat internal injuries, chest distension, abdominal pain, muscle pain and eczema. In *Zhejiang Medicinal Flora*, it was mainly used to treat sore muscles and bones, toothache, chronic pain, headache and eczema.<sup>[12]</sup> In *Qinling Bashan Natural Flora*, PSZ was mainly used to treat sores, furuncles and swelling.<sup>[13]</sup> At present, PSZ is known to have antibacterial, anti-inflammatory, anti-tumour, antioxidant and antiviral effects.<sup>[9]</sup> In addition, PSZ has other pharmacological effects, such as anti-atherosclerosis,<sup>[14]</sup> anti-ageing<sup>[15]</sup> and antihypertensive sedation effects.<sup>[16]</sup>

China has a long history of treating rhinitis with PSZ and has achieved good results. In recent years, PSZ has been used as the main medicine in clinical Chinese medicine preparations, including Xiangju tablets, Xiangju granules, Xiangju capsules and PSZ syrup, among others. PSZ has the effects of clearing heat and detoxification, promoting blood circulation and removing blood stasis, reducing swelling and purging, clearing orifices and relieving pain. It has good therapeutic effects on acute and chronic rhinitis, sinusitis, cold and fever, nasal congestion and runny nose.<sup>[17]</sup> Of these preparations, Xiangju tablet is mainly effective in dispelling wind, clearing heat and dredging orifices and is used for the treatment of various types of nasal cavity disorders.<sup>[18]</sup> Pharmacological studies have proved that Xiangju tablets have anti-inflammatory, anti-allergic and analgesic effects, can inhibit the secretion of the nasal mucosa and restore the function of nasal mucosa to achieve a complete cure.<sup>[19]</sup> Xiangju tablet is suitable for all types of sinusitis based on syndrome differentiation in traditional Chinese medicine. In these syndromes, PSZ in the lung meridian wind-heat type, the lung-spleen-qi deficiency type

and the gallbladder stagnation-heat type has outstanding curative effects, and the total effective rate is more than 80%<sup>[20]</sup> (Table 1).

### Botany

*Platycarya strobilacea* is a deciduous shrub or small tree with a height of 5 to 20 m. Young branches are often covered with brown tomentose. They have alternate singular pinnate compound leaves, 15–30 cm long; 7–23 leaflets, ovate-lanceolate or oblong-lanceolate, 4–12 cm long, 2–4 cm wide and are broad-wedge-shaped or microcentric at the base. The shape is slightly slanted, the tip is tapered, the edges are heavily serrated and the underside has dense hairs when young.<sup>[13]</sup> The flowers are unisexual, monoecious, with spikes and corymbs; the top of the centre is often bisexual. The female infructescence is at the lower end and the male inflorescence is at the upper end. PSZ infructescence fall off after flowering, leaving only the female infructescence. The buds of the male flower are lanceolate, light yellow-green, without bracteoles and a perianth, with eight stamens; The female flower has one ovate-lanceolate bract, no bracteoles, with two tepals, one pistil, no style and a 2-lobed stigma.<sup>[1, 12, 13]</sup>

The pharmacognostic and microscopic characteristics of the infructescence of *P. strobilacea* were identified by a paraffin section method, powder slicing method and physicochemical identification method.<sup>[4]</sup> The results showed that PSZ was cone-shaped, oval-elliptic or oblong, about 2.5–5 cm long, 2–3 cm in diameter and yellowish-brown to brown in color. The bracts were persistent, woody, brown, lanceolate and hard, with fish-like scales arranged on the infructescence axis. The nutlets are flattened, narrowly winged on both sides, located under lanceolate bracts, the seeds are ovate, are the seed coat is membranous. According to microscopic observations of PSZ, the results showed that the bracts were hard, the inner and outer epidermis cells were thickened with a large number of parenchyma cells, no palisade tissue and numerous vascular bundles and fibres. The pith of the infructescence axis is obvious, the parenchyma cells contain calcium oxalate crystal clusters, the pith rays reach directly to the bracts and the vascular bundles are arranged in a circle. Most of the non-glandular hairs, parenchyma cells, calcium oxalate crystal clusters, stone cells with various properties, fibre bundles and ducts can be found in the powder of PSZ.<sup>[4]</sup>

**Table 1** The traditional and clinical uses of *Platycarya strobilacea* Sieb. et Zucc. in China

| Preparation name | Main compositions                                                                                                                                                                                                                                                                                                                                                                                                                        | Traditional and clinical uses                              | References |
|------------------|------------------------------------------------------------------------------------------------------------------------------------------------------------------------------------------------------------------------------------------------------------------------------------------------------------------------------------------------------------------------------------------------------------------------------------------|------------------------------------------------------------|------------|
| Xiangju tablets  | <i>Platycarya strobilacea</i> Sieb. et Zucc. (HuaXiangShuGuoXu), <i>Chrysanthemum indicum</i> L. (YeJuHua), <i>Astragali Radix</i> (HuangQi), <i>Magnolia denudata</i> Desr. (XinYi), <i>Saposhnikovia divaricata</i> (Trucz.) Schischk. (FangFeng), <i>Prunella vulgaris</i> L. (XiaKuCao), <i>Glycyrrhizae Radix Et Rhizoma</i> (GanCao), <i>Angelicae Dahuricae Radix</i> (Baizhi) and <i>Ligusticum chuanxiong hort</i> (Chuanxiong) | Treating allergic rhinitis and chronic sinusitis           | [21, 22]   |
| Xiangju granules | <i>Platycarya strobilacea</i> Sieb. et Zucc. (HuaXiangShuGuoXu), <i>Chrysanthemum indicum</i> L. (YeJuHua), <i>Astragali Radix</i> (HuangQi), <i>Magnolia denudata</i> Desr. (XinYi), <i>Saposhnikovia divaricata</i> (Trucz.) Schischk. (FangFeng), <i>Prunella vulgaris</i> L. (XiaKuCao), <i>Glycyrrhizae Radix Et Rhizoma</i> (GanCao), <i>Angelicae Dahuricae Radix</i> (Baizhi) and <i>Ligusticum chuanxiong hort</i> (Chuanxiong) | Treating chronic rhinitis and sinusitis                    | [23–26]    |
| Xiangju capsules | <i>Platycarya strobilacea</i> Sieb. et Zucc. (HuaXiangShuGuoXu), <i>Chrysanthemum indicum</i> L. (YeJuHua), <i>Astragali Radix</i> (HuangQi), <i>Magnolia denudata</i> Desr. (XinYi), <i>Saposhnikovia divaricata</i> (Trucz.) Schischk. (FangFeng), <i>Prunella vulgaris</i> L. (XiaKuCao), <i>Glycyrrhizae Radix Et Rhizoma</i> (GanCao), <i>Angelicae Dahuricae Radix</i> (Baizhi) and <i>Ligusticum chuanxiong hort</i> (Chuanxiong) | Treating chronic sinusitis and allergic rhinitis           | [27–33]    |
| PSZ syrup        | <i>Platycarya strobilacea</i> Sieb. et Zucc. (HuaXiangShuGuoXu), <i>Prunella vulgaris</i> L. (XiaKuCao), <i>Akebia quinata</i> (Houtt.) Decne. (MuTong), <i>Xanthium sibiricum</i> Patr. ex Widder (CangErZi), <i>Dendranthema morifolium</i> (Ramat.) Tzvelev (JuHua) and <i>Magnolia denudata</i> Desr. (XinYi)                                                                                                                        | Treating chronic rhinitis, sinusitis and allergic rhinitis | [5]        |

## Phytochemistry

In the past few decades, approximately 104 compounds have been isolated from PSZ, including volatile constituents (1–52), phenolic compounds (53–87), terpenoids (88–97), a carbohydrate (98) and other constituents (99–104). Volatile constituents and phenolic compounds have a variety of pharmacological activity and are considered to be the main active components of PSZ. Their structure is shown in (Table 2, Figures 2–6).

## Volatile constituents

Volatile constituents are one of the most important active substances in PSZ. At present, 52 types of volatile constituents have been isolated from PSZ, including sesquiterpenes, long-chain hydrocarbons, fatty acids and fatty amides. The main components are sesquiterpenes. The aromatic small molecular compounds isolated from the volatile constituents of PSZ include acetic acid pentyl ester (1), 6-methyl-1-heptanol (2), 1-methanol,  $\alpha, \alpha, 4$ -trimethyl-(S)-3-cyclo-hexene (3), methyl salicylate (4), 1,2-methoxy-5-(1-propenyl)-(E)-phenol (5), 4 $\alpha, 8$ -dimethyl-2-(1-methylethylidene)-1,2,3,4,4 $\alpha, 5, 6, 8\alpha$ -octahydronaphthalene (6), 1,6-dimethyl-4-(1-methylethyl)-naphthalene (7), anthracene (8), 4-isopropyl-1,6-dimethyl-tetralin (9) and 4-isopropyl-1,6-dimethylnaphthalene (10).<sup>[7, 34]</sup> Terpenoids in volatile constituents include aromadendrene (11), guaialol (12),  $\beta$ -epi-eudesmol (13),  $\gamma$ -epi-eudesmol (14), dehydro-aromadendrene (15), cadinene (16),  $\alpha$ -calacorene (17),  $\alpha$ -elemol (18), nerolidol (19), (-)-spatulanol (20), globulol (21),  $\alpha$ -guaiene (22), aromadendrene oxide (23), isoaromadendrene epoxide (24),  $\alpha$ -eudesmol (25),  $\beta$ -eudesmol (26), eudesm-7(11)-en-4-ol (27), cubenol (28) and T-muurolool (29).<sup>[7, 34]</sup> Aliphatic small molecule compounds include nonanoic acid (30), n-decanoic acid (31), tetradecanoic acid (32), 6,10,14-trimethyl-2-pentadecanone (33), 1,2-benzenedicarboxylic acid butyl octyl ester (34), n-nexadecanoic acid (35), dibutyl phthalate (36), hexadecanoic acid ethyl ester (37), tetrapentacotane (38), hexadecanamide (39), octadecanamide (40), dotriacontane (41), fitone (42), diisobutyl phthalate (43), pentadecanoic

acid (44), 14-methylpentadecanoate (45), 9-hexadecenoic acid (46), palmitic acid (47), 8,11-octadecatrienoate (48), (Z,Z,Z)-9,12,15-octadecatrienoate (49), oleic acid (50), (Z,Z,Z)-9,12,15-octadecatrienoic acid (51) and hexacosene (52) (Table 2, Figure 2).<sup>[6, 7, 34]</sup>

## Phenolic compounds

It has been reported in the literature that tannins and gallic acid are the main chemical components in PSZ, and tannins are phenolic compounds with complex structures that exist in plants.<sup>[39, 46–51]</sup> Phenolic compounds in PSZ include phenolic acids, flavonoids and ellagitannins.

## Phenolic acids

A total of nine phenolic acids were isolated from PSZ, including 3-cadalenol (53), (-)-(7S,10R)-3-hydroxycalamenene (54), platycaryinol (55), platycaryanind A-D (56–59), platycariin (60) and strobilanin (61) (Table 2, Figure 3).<sup>[15, 35]</sup>

## Flavonoids

To date, 15 flavonoids have been isolated and identified from the infructescence, bark and leaves of PSZ, including 4'-hydroxyl-7-O- $\beta$ -D-galactoside (62), rutin (63), quercetin (64), myricetin (65), myricitrin (66), quercitrin (67), morin hydrate (68), aftoside (69), 3',4',5',5,6,7-hexahydroflavonol (70), eriodictyol (71), quercetin-3-O-(2"-O-galloyl)- $\beta$ -D-glucopyranoside (72), quercetin-3-O-(2"-O-galloyl)- $\beta$ -D-galactoside (73), quercetin-3-O- $\alpha$ -L-rhamnopyranoside (74), catechin (75) and epicatechin (76) (Table 2, Figure 4).<sup>[6, 20, 36, 37]</sup>

## Ellagitannins

At present, 13 ellagitannins have been isolated, including gallic acid (77), ellagic acid (78), 3,3'-dimethoxylellagic acid (79), 3,3'-dimethoxylellagic acid-4'-O- $\beta$ -D-xyloside (80), ellagic acid 4-O-xylopyranoside (81), 3'-O-methylellagic acid 4-O-xylopyranoside (82), 3,3'-di-O-methylellagic acid 4-O-xylopyranoside (83), 3-O-methyl ellagic acid (84), 4-O-ellagic acid (85), pedunculagin (86) and casuarictin (87) (Table 2, Figure 5).<sup>[6, 15, 35, 38]</sup>

**Table 2** Chemical compounds isolated from *Platycarya strobilacea* Sieb. et Zucc

| Classification        | No. | Chemical component                                                                                             | Part of plant  | Reference |
|-----------------------|-----|----------------------------------------------------------------------------------------------------------------|----------------|-----------|
| Volatile constituents | 1   | Acetic acid pentyl ester                                                                                       | Infructescence | [7]       |
|                       | 2   | 6-methyl-1-heptanol                                                                                            | Infructescence | [7]       |
|                       | 3   | 1-methanol, $\alpha$ , $\alpha$ , 4-trimethyl-(S)-3-cyclo-hexene                                               | Infructescence | [7]       |
|                       | 4   | Methyl salicylate                                                                                              | Infructescence | [7]       |
|                       | 5   | 1, 2-methoxy-5-(1-propenyl)-(E)-phenol                                                                         | Infructescence | [7]       |
|                       | 6   | 4 $\alpha$ , 8-dimethyl-2-(1-methylethylidene)-1, 2, 3, 4, 4 $\alpha$ , 5, 6, 8 $\alpha$ -octahydronaphthalene | Infructescence | [7]       |
|                       | 7   | 1, 6-dimethyl-4-(1-methylethyl)-naphthalene                                                                    | Infructescence | [7]       |
|                       | 8   | Anthracene                                                                                                     | Infructescence | [7]       |
|                       | 9   | 4-isopropyl-1,6-dimethyl-tetralin                                                                              | Infructescence | [34]      |
|                       | 10  | 4-isopropyl-1,6-dimethylnaphthalene                                                                            | Infructescence | [34]      |
|                       | 11  | Aromadendrene                                                                                                  | Infructescence | [7]       |
|                       | 12  | Guaiol                                                                                                         | Infructescence | [7]       |
|                       | 13  | $\beta$ -epi-eudesmol                                                                                          | Infructescence | [7]       |
|                       | 14  | $\gamma$ -epi-eudesmol                                                                                         | Infructescence | [7]       |
|                       | 15  | Dehydro-aromadendrene                                                                                          | Infructescence | [7]       |
|                       | 16  | Cadinene                                                                                                       | Infructescence | [34]      |
|                       | 17  | $\alpha$ -calacorene                                                                                           | Infructescence | [34]      |
|                       | 18  | $\alpha$ -elemol                                                                                               | Infructescence | [34]      |
|                       | 19  | Nerolidol                                                                                                      | Infructescence | [34]      |
|                       | 20  | (-)-spathulenol                                                                                                | Infructescence | [34]      |
|                       | 21  | Globulol                                                                                                       | Infructescence | [34]      |
|                       | 22  | $\alpha$ -guaiene                                                                                              | Infructescence | [34]      |
|                       | 23  | Aromadendrene oxide                                                                                            | Infructescence | [34]      |
|                       | 24  | Isoaromadendrene epoxide                                                                                       | Infructescence | [34]      |
|                       | 25  | $\alpha$ -eudesmol                                                                                             | Infructescence | [34]      |
|                       | 26  | $\beta$ -eudesmol                                                                                              | Infructescence | [34]      |
|                       | 27  | Eudesm-7(11)-en-4-ol                                                                                           | Infructescence | [34]      |
|                       | 28  | Cubenol                                                                                                        | Infructescence | [34]      |
|                       | 29  | T-muurolol                                                                                                     | Infructescence | [34]      |
|                       | 30  | Nonanoic acid                                                                                                  | Infructescence | [7]       |
|                       | 31  | n-decanoic acid                                                                                                | Infructescence | [7]       |
|                       | 32  | Tetradecanoic acid                                                                                             | Infructescence | [7]       |
|                       | 33  | 6,10,14-trimethyl-2-pentadecanone                                                                              | Infructescence | [7]       |
|                       | 34  | 1,2-benzenedicarboxylic acid butyl octyl ester                                                                 | Infructescence | [7]       |
|                       | 35  | n-nexadecanoic acid                                                                                            | Infructescence | [7]       |
|                       | 36  | Dibutyl phthalate                                                                                              | Infructescence | [7]       |
|                       | 37  | Hexadecanoic acid ethyl ester                                                                                  | Infructescence | [7]       |
|                       | 38  | Tetrapentacontane                                                                                              | Infructescence | [7]       |
|                       | 39  | Hexadecanamide                                                                                                 | Infructescence | [7]       |
|                       | 40  | Octadecanamide                                                                                                 | Infructescence | [7]       |
|                       | 41  | Dotriacontane                                                                                                  | Infructescence | [7]       |
|                       | 42  | Fitone                                                                                                         | Infructescence | [34]      |
|                       | 43  | Diisobutyl phthalate                                                                                           | Infructescence | [34]      |
|                       | 44  | Pentadecanoic acid                                                                                             | Infructescence | [34]      |
|                       | 45  | 14-methylpentadecanoate                                                                                        | Infructescence | [34]      |
|                       | 46  | 9-hexadecenoic acid                                                                                            | Infructescence | [34]      |
|                       | 47  | Palmitic acid                                                                                                  | Infructescence | [34]      |
|                       | 48  | 8,11-octadecatrienoate                                                                                         | Infructescence | [34]      |
|                       | 49  | (Z, Z, Z)-9,12,15-octadecatrienoate                                                                            | Infructescence | [34]      |
|                       | 50  | Oleic acid                                                                                                     | Infructescence | [34]      |
|                       | 51  | (Z, Z, Z)-9,12,15-octadecatrienoic acid                                                                        | Infructescence | [34]      |
|                       | 52  | Hexacosene                                                                                                     | Infructescence | [6]       |

Table 2 Continued

| Classification | No.        | Chemical component                                       | Part of plant                           | Reference      |      |
|----------------|------------|----------------------------------------------------------|-----------------------------------------|----------------|------|
| Phenolic acids | 53         | 3-cadalenol                                              | Fresh woods                             | [35]           |      |
|                | 54         | (-)-(7S,10R)-3-hydroxycalamenene                         | Fresh woods                             | [35]           |      |
|                | 55         | Platycaryinol                                            | Fresh woods                             | [35]           |      |
|                | 56         | Platycaryanind A                                         | Infructescence                          | [15]           |      |
|                | 57         | Platycaryanind B                                         | Infructescence                          | [15]           |      |
|                | 58         | Platycaryanind C                                         | Infructescence                          | [15]           |      |
|                | 59         | Platycaryanind D                                         | Infructescence                          | [15]           |      |
|                | 60         | Platycariin                                              | Infructescence                          | [15]           |      |
|                | 61         | Strobilanin                                              | Infructescence                          | [15]           |      |
|                | Flavonoids | 62                                                       | 4'-hydroxyl-7-O- $\beta$ -D-galactoside | Infructescence | [6]  |
|                |            | 63                                                       | Rutin                                   | Infructescence | [20] |
| 64             |            | Quercetin                                                | Infructescence                          | [20]           |      |
| 65             |            | Myricetin                                                | Barks                                   | [36]           |      |
| 66             |            | Myricitrin                                               | Barks                                   | [36]           |      |
| 67             |            | Quercitrin                                               | Barks                                   | [36]           |      |
| 68             |            | Morin hydrate                                            | Barks                                   | [36]           |      |
| 69             |            | Aftoside                                                 | Barks                                   | [36]           |      |
| 70             |            | 3', 4', 5', 5, 6, 7-hexahydroflavonol                    | Barks                                   | [36]           |      |
| 71             |            | Eriodictyol                                              | Leaves                                  | [37]           |      |
| 72             |            | Quercetin-3-O-(2'-O-galloyl)- $\beta$ -D-glucopyranoside | Leaves                                  | [37]           |      |
| 73             |            | Quercetin-3-O-(2'-O-galloyl)- $\beta$ -D-galactoside     | Leaves                                  | [37]           |      |
| 74             |            | Quercetin-3-O- $\alpha$ -L-rhamnopyranoside              | Leaves                                  | [37]           |      |
| Ellagitannins  |            | 75                                                       | Catechin                                | Infructescence | [20] |
|                | 76         | Epicatechin                                              | Infructescence                          | [20]           |      |
|                | 77         | Gallic acid                                              | Infructescence                          | [6, 38]        |      |
|                | 78         | Ellagic acid                                             | Infructescence                          | [6, 15, 38]    |      |
|                | 79         | 3,3'-dimethoxylellagic acid                              | Infructescence                          | [6]            |      |
|                | 80         | 3,3'-dimethoxylellagic acid-4'-O- $\beta$ -D-xyloside    | Infructescence                          | [6]            |      |
|                | 81         | Ellagic acid 4-O-xylopyranoside                          | Fresh woods                             | [35]           |      |
|                | 82         | 3'-O-methylellagic acid 4-O-xylo-pyranoside              | Fresh woods                             | [35]           |      |
|                | 83         | 3,3'-di-O-methy-lellagic acid 4-O-xylopyranoside         | Fresh woods                             | [35]           |      |
|                | 84         | 3-O-methyl ellagic acid                                  | Fresh woods                             | [35]           |      |
|                | 85         | 4-O-ellagic acid                                         | Infructescence                          | [15]           |      |
| Terpenoids     | 86         | Pedunculagin                                             | Infructescence                          | [38]           |      |
|                | 87         | Casuarictin                                              | Infructescence                          | [38]           |      |
|                | 88         | Uosolic acid                                             | Infructescence                          | [6, 39]        |      |
|                | 89         | $\beta$ -sitosterol                                      | Infructescence                          | [6]            |      |
|                | 90         | Daucosterol                                              | Infructescence                          | [6]            |      |
|                | 91         | 8,11-dihydroxy-2,4-cycloedesmane                         | Woods                                   | [40]           |      |
|                | 92         | 11-hydroxy-2,4-cycloedesman-8-one                        | Woods                                   | [40]           |      |
|                | 93         | 2,4-cyclo-7(11)-eudesmen-8-one                           | Woods                                   | [40]           |      |
|                | 94         | 7-hydroperoxy-11-hydroxy-2,4-cycloedesman-8-one          | Woods                                   | [41]           |      |
|                | 95         | 8-hydroxy-13-nor-2,4-cycloedesman-7-en-11-one            | Woods                                   | [41]           |      |
|                | 96         | 2,4-cycloedesma-7(11), 8-dien-(12, 8)-olide              | Woods                                   | [41]           |      |
|                | 97         | 8-hydroxy-8,12-peroxy-2,4-cycloedesm-7(11)-ene           | Woods                                   | [41]           |      |
| Carbohydrate   | 98         | D-glucose                                                | Infructescence                          | [42]           |      |
| Others         | 99         | 2,5,8-Trihydroxy-3-methoxy-1,4-naphthoquinone            | Infructescence                          | [6]            |      |
|                | 100        | Vitamin C                                                | Infructescence                          | [43]           |      |
|                | 101        | 5-hydroxy-1,4-naphthoquinone                             | Leaves                                  | [44]           |      |
|                | 102        | 5-hydroxy-2-methoxy-1,4-naphthoquinone                   | Leaves                                  | [37, 44, 45]   |      |
|                | 103        | 5-hydroxy-3-methoxy-1,4-naphthoquinone                   | Leaves                                  | [44]           |      |
|                | 104        | 4,8-dihydroxynaphthalene-1-O- $\beta$ -D-glucoside       | Leaves                                  | [37]           |      |

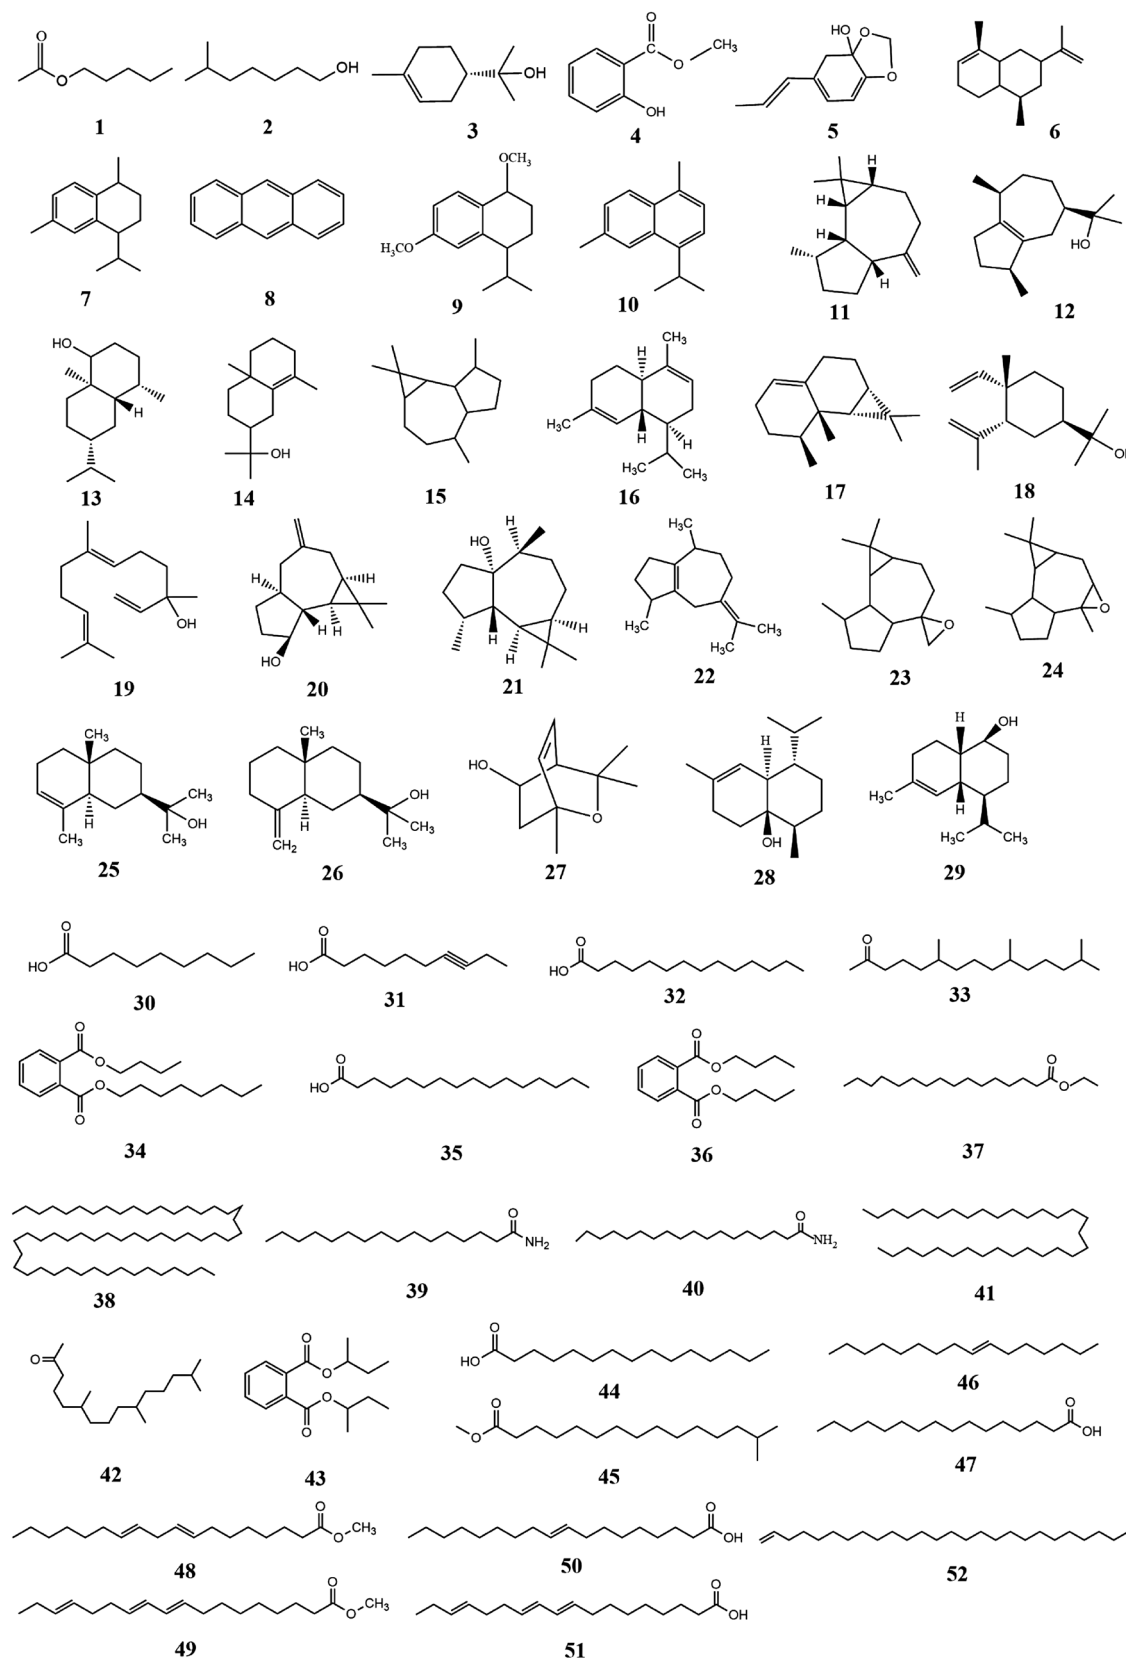

**Figure 2** The chemical structures of volatile constituents.

### Terpenoids

At present, 10 terpenoids have been isolated from the infructescence and wood of PSZ, including uosolic acid

(88),  $\beta$ -sitosterol (89), daucosterol (90), 8,11-dihydroxy-2,4-cycloeudesmane (91), 11-hydroxy-2,4-cycloeudesman-8-one (92), 2,4-cyclo-7(11)-eudesmen-8-one (93),

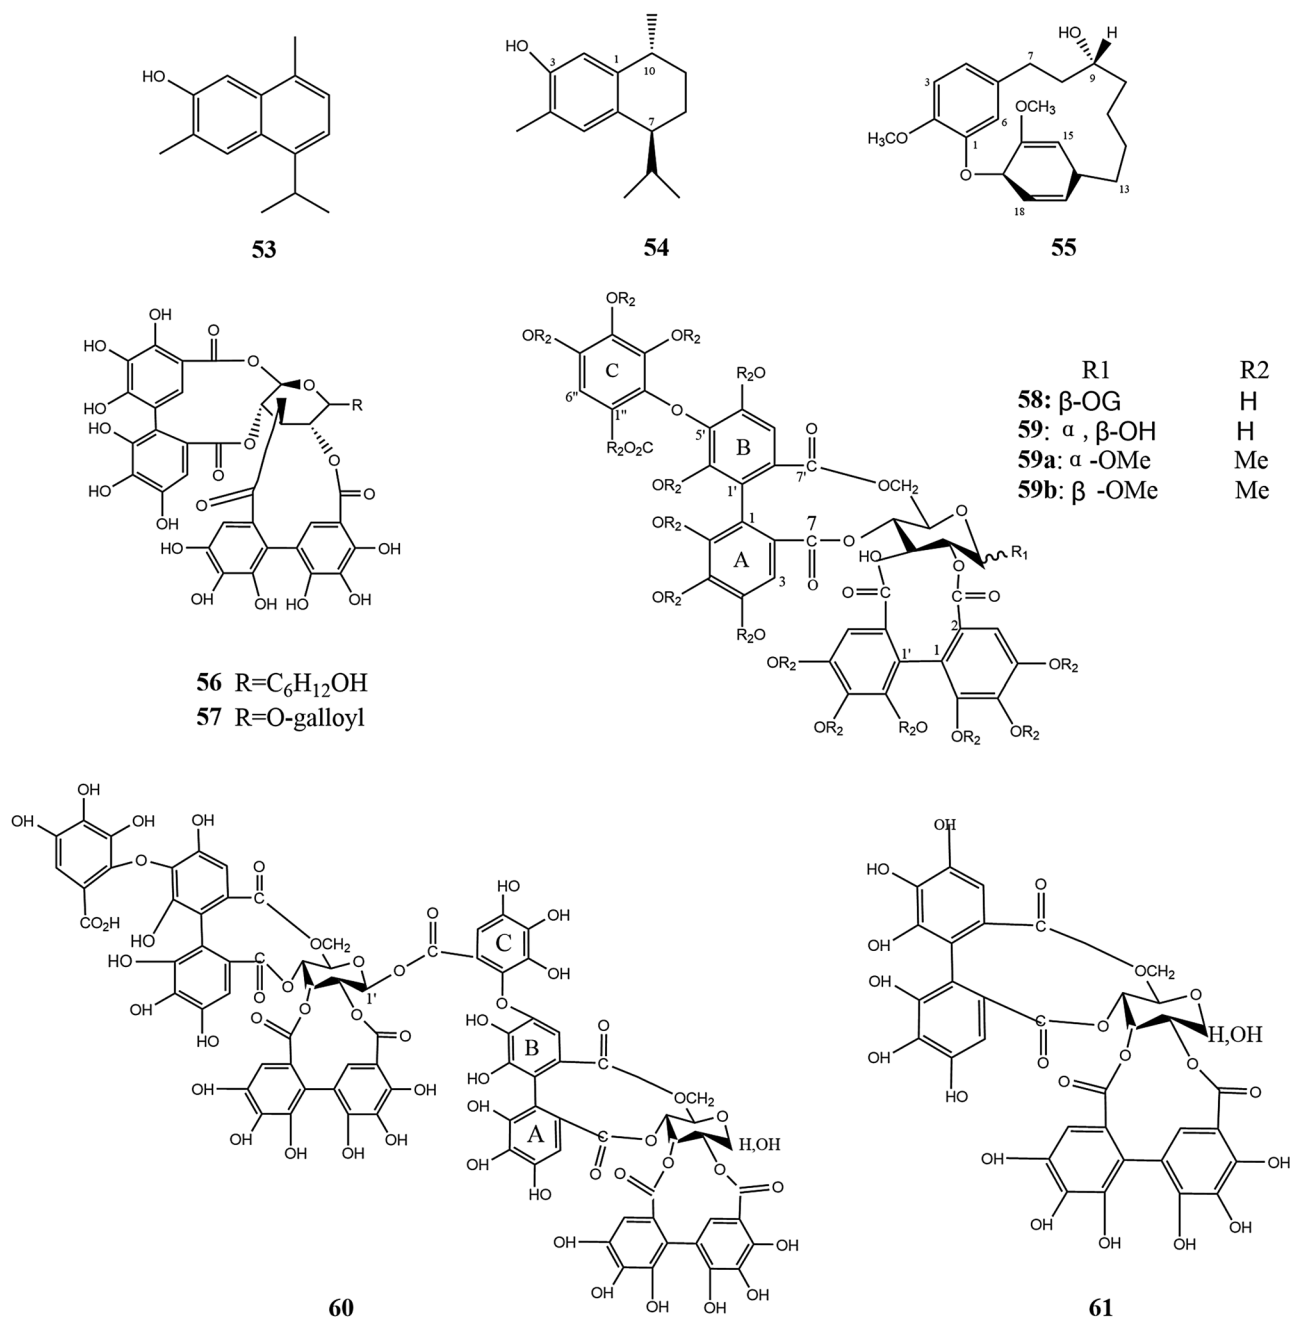

**Figure 3** The chemical structures of phenolic acids.

7-hydroperoxy-11-hydroxy-2,4-cycloudesman-8-one (94), 8-hydroxy-13-nor-2,4-cycloudesman-7-en-11-one (95), 2,4-cycloudesma-7(11),8-dien-(12, 8)-olide (96) and 8-hydroxy-8,12-peroxy-2,4-cycloudesm-7(11)-ene (97) (Table 2, Figure 6).<sup>[6, 40, 41]</sup>

### Carbohydrate

To date, d-glucose (98) has been isolated and identified from the ethanol extract of the infructescence of PSZ<sup>[42]</sup> (Table 2, Figure 6).

### Other compounds

There are also other components in PSZ, including 2,5,8-Trihydroxy-3-methoxy-1,4-naphthoquinone (99),

vitamin C (100), 5-hydroxy-1,4-naphthoquinone (101), 5-hydroxy-2-methoxy-1,4-naphthoquinone (102), 5-hydroxy-3-methoxy-1,4-naphthoquinone (103) and 4,8-dihydroxynaphthalene-1-O-β-D-glucoside (104) (Table 2, Figure 6).<sup>[6, 37, 44, 45]</sup>

### Extraction Methods

The extraction of PSZ mainly involves the extraction of flavonoids, phenols, polysaccharides, ellagic acid, tannins and other active ingredients. The response surface method is mostly used to optimize the extraction process, but the extraction time varies greatly. When extracting one of the effective parts, the extraction rate of the other effective parts is not fully considered. Single components are

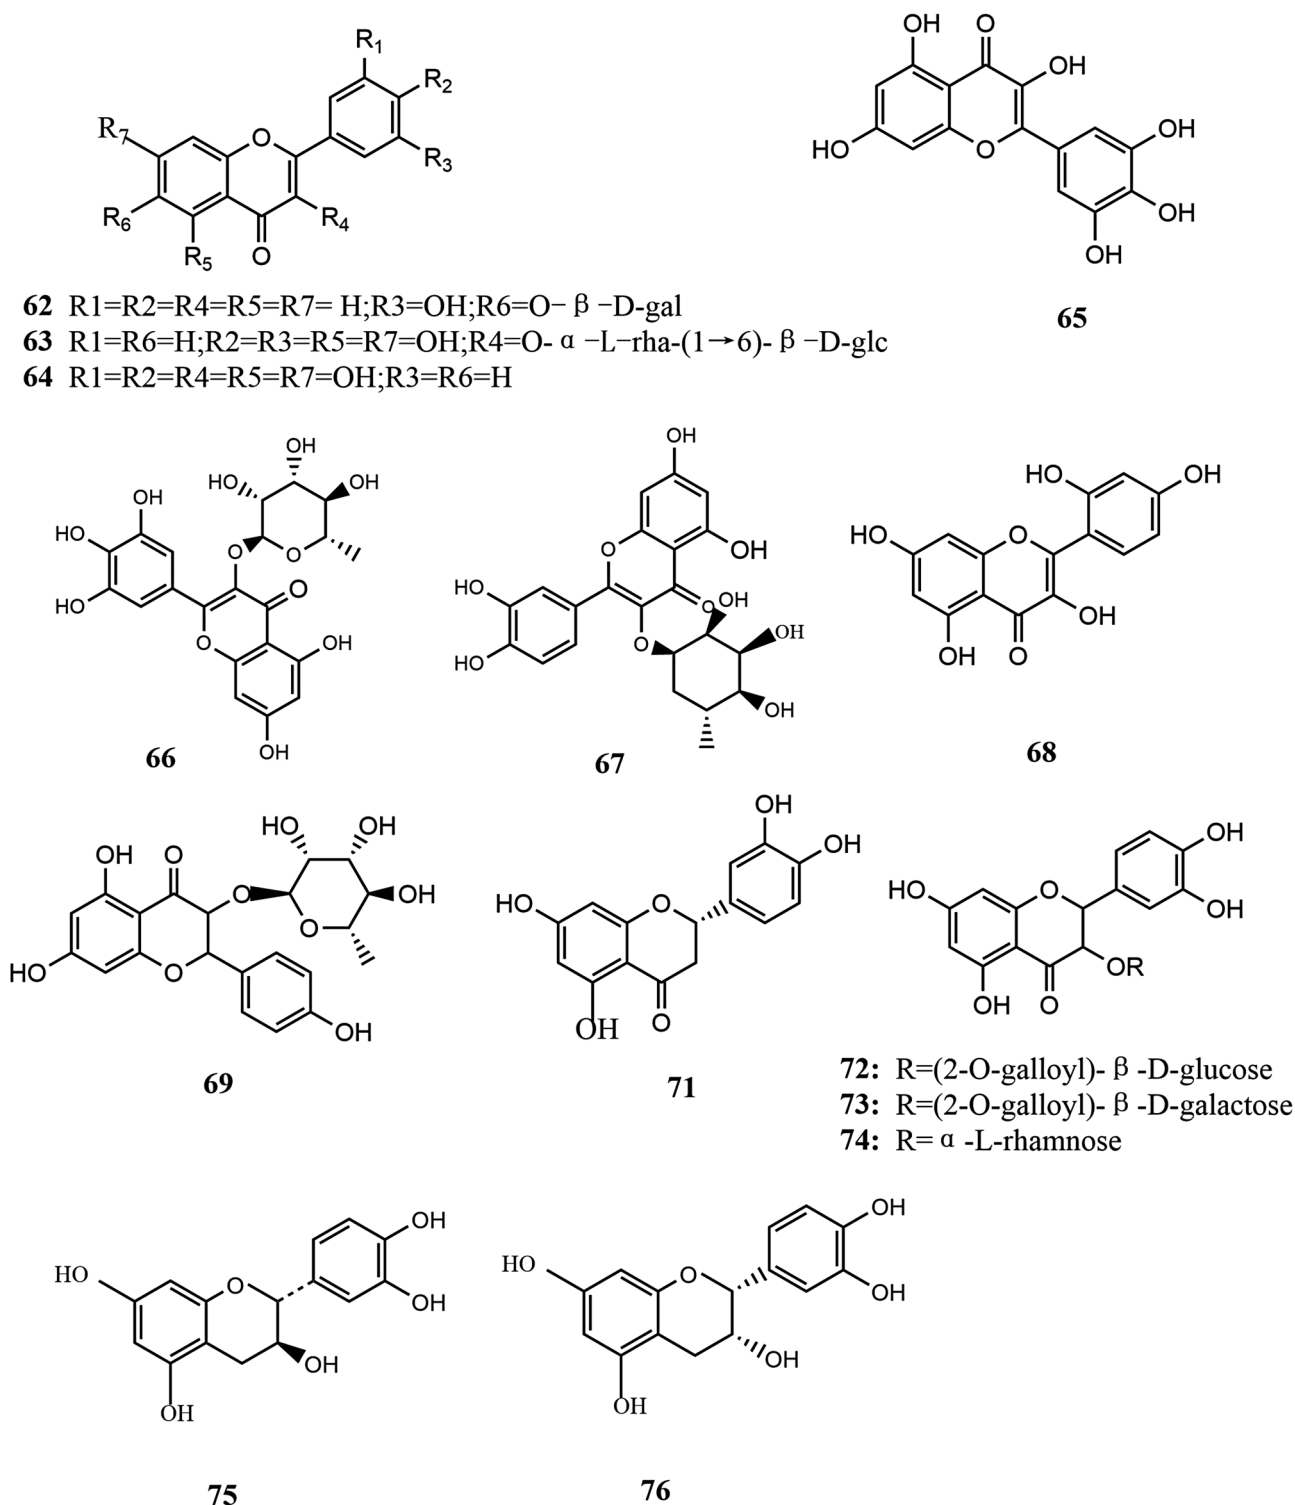

**Figure 4** The chemical structures of flavonoids.

extracted, and there are fewer optimization processes for volatile constituents, terpenoids and other components. In the future, more consideration should be given to the comprehensive extraction of multiple components, and optimization of the extraction process for volatile constituents and terpenoids, and in-depth research on the extraction methods should be conducted.<sup>[8]</sup> The PSZ extraction methods are summarized in [Table 3](#).

## Pharmacology

### *Antibacterial and anti-inflammatory effects*

Modern pharmacological studies have shown that the phenolic compounds of PSZ have a strong inhibitory effect on the bacteria found in patients with rhinitis and sinusitis.<sup>[20, 55]</sup>

Lin<sup>[20]</sup> studied the antibacterial activity of the extract of PSZ, using the main infectious bacteria *Staphylococcus aureus* ATCC25923, *Escherichia coli* ATCC35218, *Streptococcus*



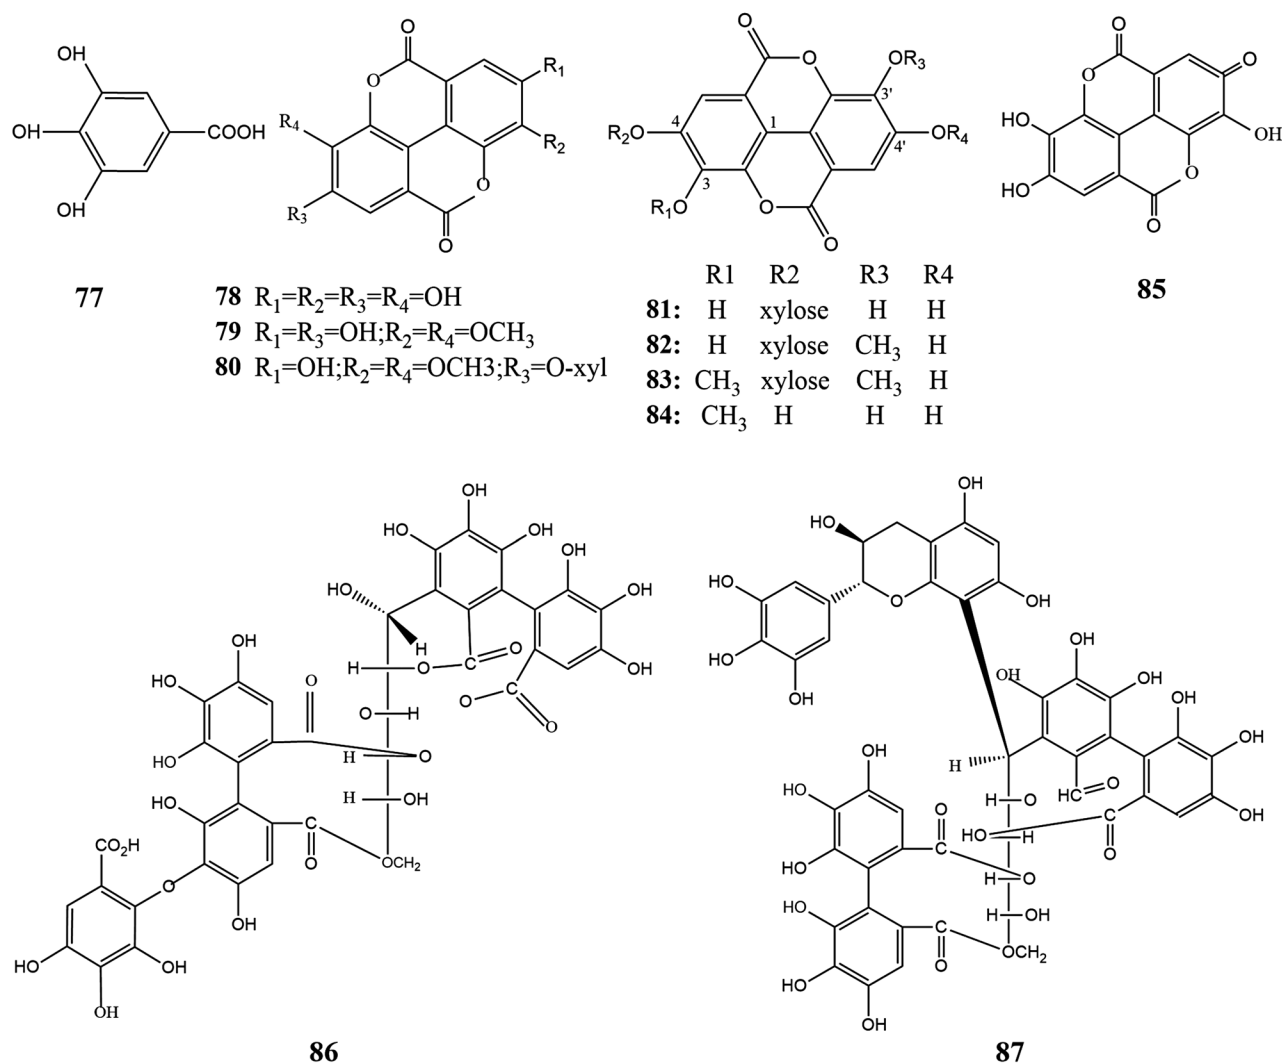

**Figure 5** The chemical structures of ellagitannins.

*pneumoniae* ATCC49619 and *Pseudomonas aeruginosa* ATCC27853 as test bacteria. The in vitro antibacterial test showed that flavonoids had strong antibacterial effects on these four types of bacteria, and it was determined for the first time that flavonoids were one of the main antibacterial components for rhinitis and sinusitis. Liu<sup>[55]</sup> investigated the antibacterial activity of plant polyphenols against the above four bacteria by determining the inhibition zone, minimal inhibitory concentration (MIC) and minimal bactericidal concentration. The results showed that PSZ polyphenols have a strong inhibitory effect on bacteria.

Zhang et al.<sup>[62]</sup> extracted and purified tannin polymer fractions with a different molecular weight distribution from *P. strobilacea* infructescence (PSI), and tested the antimicrobial activity of these tannin polymer fractions. The results showed that all PSI tannin polymer fractions (TPF-1, TPF-2, TPF-3, TPF-4 and TPF-5) showed significant antibacterial activity against *S. aureus* and *E. coli* with low MIC values.

#### Anti-tumour effect

Liu et al.<sup>[63]</sup> found that an extract of the infructescence of *P. strobilacea* Sieb. et Zucc. (EPS) had a significant

anti-nasopharyngeal carcinoma (NPC) effect in vitro. These results indicate that EPS may induce the death of NPC cells and inhibit NPC by regulating the Ras proto-oncogene (RAS)/mitogen-activated protein kinase (MAPK) signaling pathway and the transcription factor c-Fos proto-oncogene (c-FOS) and death of its downstream genes, to play a role in fighting NPC.

Zhang et al.<sup>[64]</sup> evaluated the anti-tumour activity of this plant in A549, HepG2, SH-SY-5Y, HCT116 and U2OS-NKFB cell lines. Among the different extracts from PSI, methanol extract had the strongest cytotoxic effect on SH-SY-5Y cells, and ethyl acetate extract had a strong anti-cancer effect on A549, HepG2, HCT116 and U2OS-NKFB cell activity. Moreover, Li YP et al.<sup>[65]</sup> determined the cytotoxic effect of PSI on human CNE2 NPC cells using the MTT method. These results showed that PSI had a strong inhibitory effect on the growth of human CNE2 NPC cells.

#### Antioxidant effect

Babu et al.<sup>[66]</sup> found that the antioxidant components of EPS can prevent the activation of NF- $\kappa$ B induced by TNF- $\alpha$ , the induction of chemokines and the adhesion of monocytes in intestinal inflammation. EPS inhibited the increase of reactive

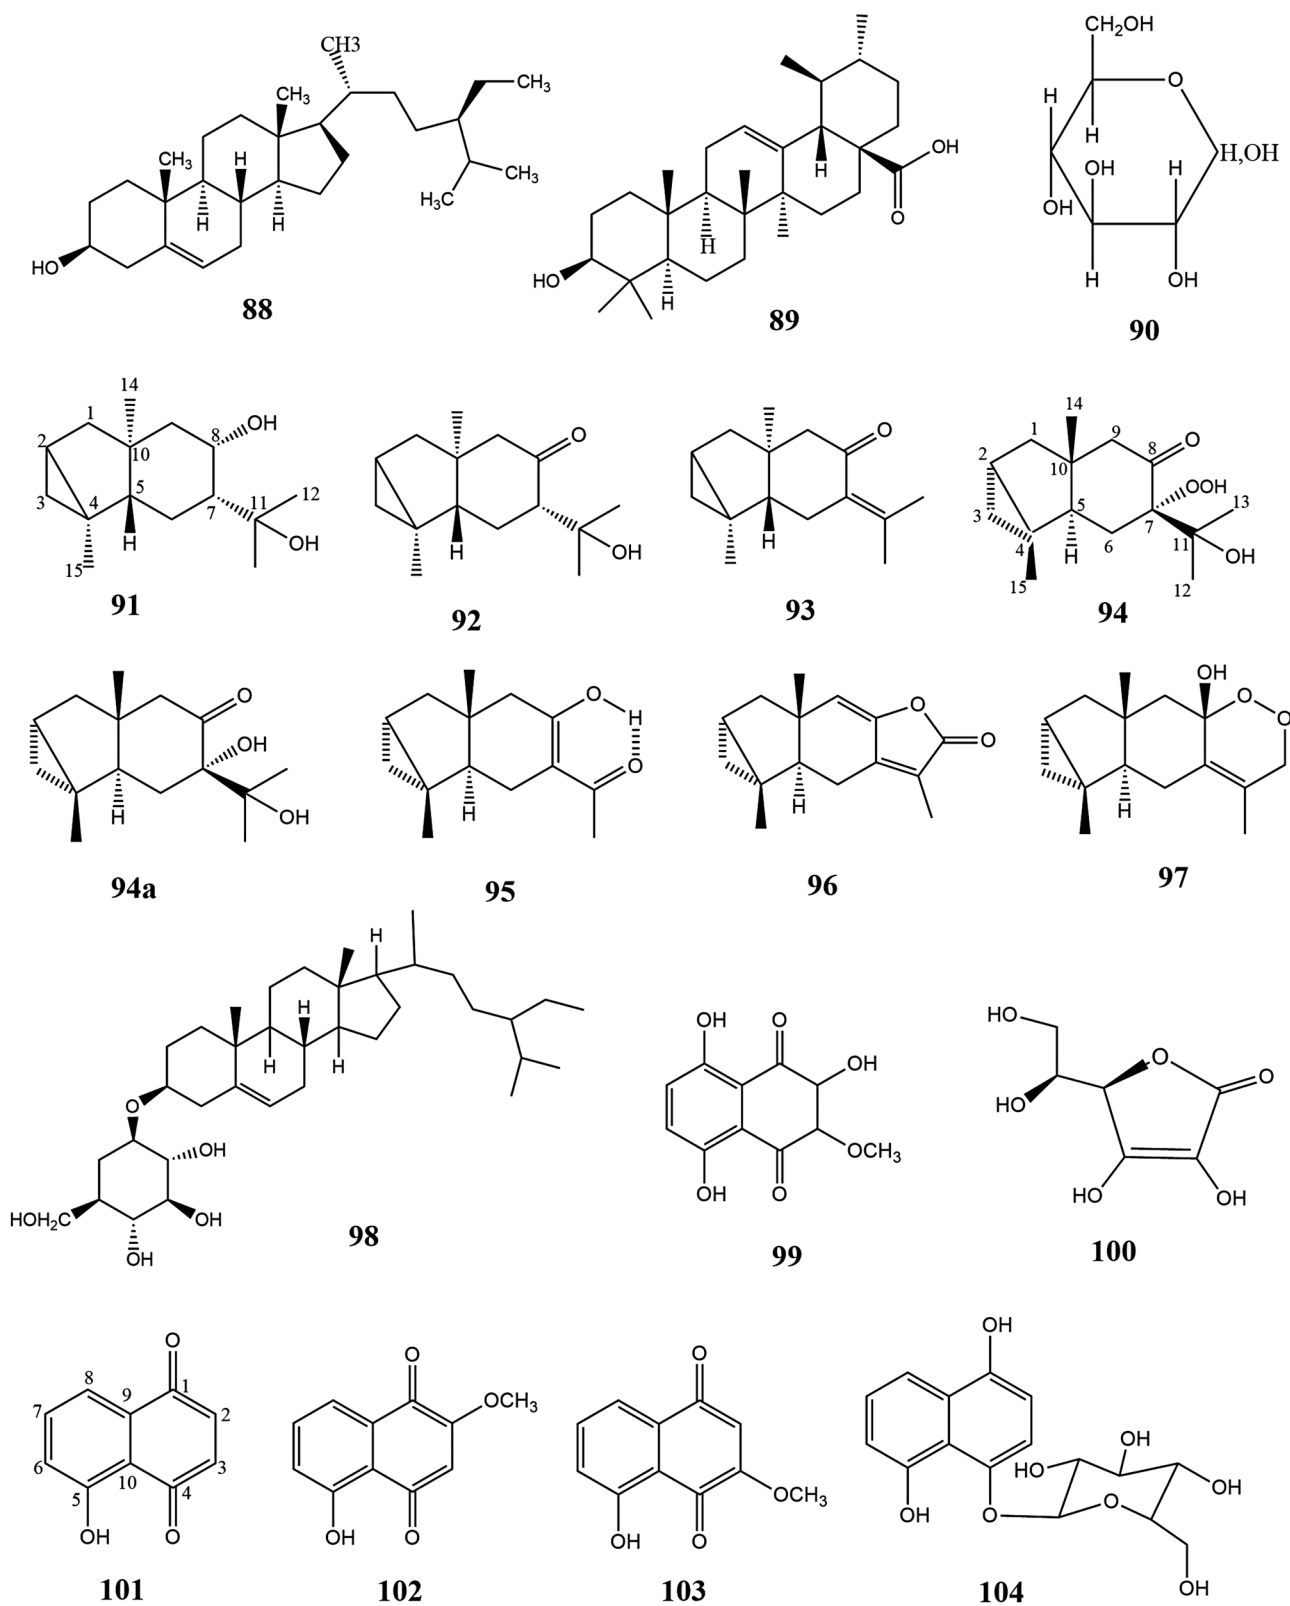

**Figure 6** The chemical structures of terpenoids, carbohydrate and other compounds.

oxygen species induced by TNF- $\alpha$ , and showed scavenging activity of DPPH free radicals.

Xu et al.<sup>[67]</sup> measured the DPPH free radical scavenging ability and the total antioxidant capacity of the plant (FRAP

method). The results showed that both the crude extract of PSZ and the purified product of PSZ extract had strong antioxidant activity, and the antioxidant activity of the purified polyphenols was further enhanced.

**Table 3** Method for extracting *Platycarya strobilacea* Sieb. et Zucc

| Active ingredients    | Extraction method                          | Extraction reagent | Extraction temperature (°C) | Extraction time (h) | Material to liquid ratio (mL/g) | Number of extractions | Extraction rate (%) | References |
|-----------------------|--------------------------------------------|--------------------|-----------------------------|---------------------|---------------------------------|-----------------------|---------------------|------------|
| Flavonoids            | Ultrasonic extraction                      | 60% Ethanol        | /                           | 0.77                | 10.50                           | 3                     | 4.01                | [17, 52]   |
| Flavonoids            | Ethanol reflux extraction method           | 70% Ethanol        | 60°C                        | 4.5                 | 10                              | 3                     | 4.25                | [17, 53]   |
| Flavonoids            | Ethanol reflux extraction method           | 65% Ethanol        | 60°C                        | 2                   | 9                               | 3                     | 4.29                | [20, 54]   |
| Phenols               | Ethanol reflux extraction method           | 55% Ethanol        | 77°C                        | 1.5                 | 14                              | 3                     | 3.646               | [54, 55]   |
| Phenols               | Ethanol reflux extraction method           | 55% Ethanol        | 77°C                        | 1.5                 | 14                              | 3                     | 3.746               | [56]       |
| Ellagic acid          | Ultrasonic extraction                      | Methanol           | 70°C                        | 0.67                | 22.5                            | 2                     | 1.961               | [57]       |
| Ellagic acid          | Alkaline extraction and acid precipitation | /                  | 85°C                        | 1.3                 | 13                              | 3                     | 1.47                | [58]       |
| Tannins               | /                                          | Water              | 90°C                        | 1.3                 | 17.5                            | 2                     | 50                  | [59]       |
| Volatile constituents | Steam distillation                         | Ethyl acetate      | /                           | 4                   | /                               | /                     | 0.12                | [34]       |
| Polysaccharides       | /                                          | Ethanol            | 85°C                        | 2.8                 | 22                              | 2                     | 3.57                | [60]       |
| Polysaccharides       | Ultrasonic extraction                      | 95% Ethanol        | 52°C                        | 0.67                | 25                              | 3                     | 3.959               | [61]       |

### Antiviral effect

Li YP et al.<sup>[65]</sup> first used an indirect immunoenzyme method to study the effect of PSZ on the expression of Epstein-Barr (EB) virus capsid antigen (VCA) in B<sub>95,8</sub> cells. The results showed that the plant had a significant inhibitory effect on the expression of EB VCA in B<sub>95,8</sub> cells stimulated by sodium butyrate at a non-toxic concentration.

### Prevention and treatment of COVID-19

COVID-19 belongs to the category of 'damp toxin epidemic'. It is a disease caused by cold and dampness, which invades the human body. The disease is located in the lungs and spleen, which can spread to the heart, liver and kidneys, with cold-dampness injuring yang and has the syndrome of transforming heat, injuring yin, causing blood stasis and shutting off.<sup>[68]</sup> A network pharmacology study found that the main effective components on COVID-19 are quercetin, luteolin and β-sitosterol.<sup>[69, 70]</sup> These active ingredients are all contained in PSZ, and the plant has antibacterial, anti-inflammatory and anti-virus effects. The use of PSZ to prevent and cure COVID-19 can play a role in removing dampness, invigorating the stomach, relieving exterior factors and dispelling pathogens. Therefore, PSZ has a potential preventive and therapeutic effect on COVID-19, which is worthy of further study.

### Other pharmacological effects

Some studies had shown that plant polyphenols have an effect on cardiovascular and cerebrovascular diseases, can increase blood flow rate, and reduce the probability of cerebral infarction and cerebral hemorrhage, and may play a role in preventing cardiovascular and cerebrovascular diseases.<sup>[55]</sup> In addition, polyphenols have an anti-atherosclerotic effect by regulating blood lipid metabolism, anticoagulation and promoting fibrinolysis and inhibiting platelet aggregation.<sup>[14]</sup> Lee et al.<sup>[71]</sup> found that *P. strobilacea* leaf extract (PLE) can inhibit the loss of alveolar bone caused by periodontitis, and may be beneficial ingredient in promoting oral health. Additionally, Kim et al.<sup>[15]</sup> found that *P. strobilacea* Sieb. et

Zucc. extract can be added to cosmetic preparations as it has an anti-ageing effect. Some studies have shown that PSZ polysaccharides have a protective effect on cerebral ischemia reperfusion injury in rats.<sup>[72]</sup>

### Toxicology

At present, there are few studies on the toxicology of PSZ. PSZ syrup is the main medicine used for the treatment of acute chronic rhinitis and allergic rhinitis. After two years of clinical observation, PSZ syrup was shown to have a rapid effect on the above symptoms, without adverse reactions.<sup>[5]</sup>

Studies have shown that ellagic acid (EA) is rapidly eliminated from mice after oral administration. The levels of EA in the blood, lung and liver of mice were very low or undetectable. The pharmacokinetic characteristics of EA indicate that both animals and humans can tolerate EA, it is rapidly eliminated and is malabsorbed, and there is no evidence of systemic toxicity even at high doses.<sup>[46, 73]</sup>

### Discussion and Conclusion

This review systematically summarized the traditional uses, botany, phytochemistry, extraction methods, pharmacology and toxicology of PSZ, and provided comprehensive information on this plant. To date, a total of 104 compounds have been identified in PSZ, including volatile constituents, phenolic compounds, terpenoids and a carbohydrate. PSZ has a wide range of pharmacological effects, including antibacterial, anti-inflammatory, anti-tumour, antioxidant and antiviral effects, especially in the treatment of allergic rhinitis and chronic sinusitis, with significant curative effects and wide applications. Although continuous progress has been made in all aspects of PSZ, research is still needed on development of the plant and the research and development of new drugs.

First, there are very few studies on the pharmacokinetics and toxicology of PSZ, which is the reason why there is little research and development of the plant. Therefore, more research on the pharmacokinetics and toxicology of the drug

should be carried out. Second, most of the studies on the pharmacological activity of this plant are limited to the study of single components such as volatile constituents, flavonoids or polyphenols and the pharmacological activity of the plant such as anti-tumour and antioxidation has only been studied in animal experiments or *in vitro*, without the support of clinical trials. Therefore, systematic clinical trials of PSZ infructescence should be performed in the future. Third, with the exception of studies on the infructescence of the plant, there are few studies on the other parts of the plant such as the flowers, leaves, trunk and fruits. Therefore, it is necessary to carry out basic studies on the chemical constituents and pharmacological effects of other parts of the plant to fully determine the medicinal potential of the plant. Fourth, due to the complex chemical composition of PSZ, an international unified method of content determination and identification is needed to control the quality and to establish a standardized fingerprint of the plant. Finally, PSZ is effective in the treatment of rhinitis and sinusitis. At present, the traditional Chinese medicine preparations containing PSZ as the main drug include Xiangju tablets, Xiangju granules and Xiangju capsules, but the compatibility of these preparations is not versatile enough. Thus, more preparations should be developed to meet clinical needs.

This study systematically summarizes the traditional uses, botany, chemical constituents, extraction methods, pharmacology and toxicology of PSZ. We hope that this review will reflect the importance of the plant, and provide some guidance for the future development of this plant.

## Acknowledgement

We thank International Science Editing (<http://www.internationalscienceediting.com>) for editing this manuscript.

## Author Contributions

Peiyuan Zhao wrote the manuscript; Lizhu Han and Yunlan Wang completed the Figure 1 and Figure 2; Jinqing Qiu and Xinbo Zhang collected some literature; Xi Duan and Zhishu Tang systemically revised the manuscript for important content; Xiao Song proposed the conception and designed the structure of the manuscript.

## Funding

This work was supported by the National Key Research and Development Program for Traditional Chinese Medicine Modernization [grant number 2019YFC1711200, 2019YFC1711204]; the Project of Shaanxi Provincial Education Department [grant number 17JS031]; the Project of Shaanxi Provincial Department of Science and Technology [grant number 2017SF-359]; Shaanxi Provincial Key Laboratory of TCM Foundation and New Drug Research [grant number 1008]; and the Special Grant for Shaanxi Key Discipline of Traditional Chinese Medicine Pharmacy [grant number 303061107].

## Conflict of Interest

The authors declare no conflict of interest.

## Ethics Statement

This study has no privacy issues regarding participants, therefore the review will not require ethical approval.

## References

1. Jiangsu New Medical College. *Dictionary of Traditional Chinese Medicine*, Vol. 1. Shanghai People's Publishing House, 1977 [In Chinese].
2. Liu JL. Effect of montelukast sodium combined with Xiangju tablets in the treatment of allergic rhinitis. *Clin Res Pract* 2018; 3: 132–3. doi:10.19347/j.cnki.2096-1413.201835061 [In Chinese]
3. Chen J, Kadriya M, Zhang J *et al.* Analysis of the effect of Xiangju tablets combined with eucalyptus pinnacle entericcoated capsules on acute and chronic sinusitis. *Chin Med Dig Otorhinolaryngology* 2020; 35: 351–352+367. doi:10.19617/j.issn1001-1307.2020.05.351 [In Chinese]
4. Li YP, Lei XL. Pharmacognostical study on *Platycarya Strobilacea* Sieb. et Zucc. infructescence. *Strait Pharm J* 2009; 21: 73–5. doi:10.3969/j.issn.1006-3765.2009.05.033 [In Chinese]
5. Zhang XY, Zhang MH. Preparation and clinical application of *Platycarya strobilacea* Sieb. et Zucc. syrup. *Chin J Hosp Pharm* 1999; 19: 53–4. doi:10.3321/j.issn:1001-5213.1999.07.035 [In Chinese]
6. Jia XN, Wang JX, Cheng YL *et al.* Chemical constituents from infructescence of *Platycarya strobilacea*. *J Chin Med Mater* 2016; 39: 1786–8. doi:10.13863/j.issn1001-4454.2016.08.024 [In Chinese]
7. Wang MY *et al.* Study on chemical constituents of the volatile oil from infructescence of *Platycarya strobilacea*. *Chin J Hosp Pharm* 2011; 31: 736–8. doi:CNKI:SUN:ZGYZ.0.2011-09-011 [In Chinese]
8. Liu JK, Ying M, Xu WJ *et al.* Phytochemical and pharmacological advance on infructescence of *Platycarya Strobilacea*. *Guid J Tradit Chin Med Pharm* 2019; 25: 87–91. doi:10.13862/j.cnki.cn43-1446/r.2019.03.023 [In Chinese]
9. Liu BT, Yuan CY, Huang JY *et al.* Research progress on chemical constituents from infructescence of *Platycarya strobilacea* and their pharmacological activities. *Chin J Exp Trad Med Form* 2019; 25: 227–34. doi:10.13422/j.cnki.syfjx.20192006 [In Chinese]
10. Wang LX, Guo PL. *Platycarya strobilacea* fruit spike experimental research on pharmacology. *Northwest Pharm J* 2000; 15: 77. doi:10.3969/j.issn.1004-2407.2000.02.035 [In Chinese]
11. Zhang L, Jin X, Shi F *et al.* Geographical pattern of the pedigree of the endemic plants in East Asia. In: 2011 National System and Evolutionary Botany and Proceedings of the Tenth Youth Academic Symposium. Ed. Yunnan Botany Society, 2011 [In Chinese]
12. Zhejiang Medicinal Flora Writing Group. *Zhejiang Medicinal Flora*, Vol. 1. Zhejiang, China: Zhejiang Science and Technology Press, 1980 [In Chinese].
13. Li SQ. *Qinling Bashan Natural Medicines*. Shaanxi, China: Shaanxi Science and Technology Press, 1987 [In Chinese]
14. Pan MX, Liu SJ, Liu GQ *et al.* Determination of four effective components in plasma of rats with atherosclerosis after intragastric administration of green tea extract by HPLC. *Chin J Exp Trad Med Form* 2017; 23: 92–7. doi:10.13422/j.cnki.syfjx.2017080092 [In Chinese]
15. Kim YH, Kim KH, Han CS *et al.* Anti-wrinkle activity of *Platycarya strobilacea* extract and its application as a cosmeceutical ingredient. *J Cosmet Sci* 2010; 61: 211–24. doi:10.1.1.876.1532
16. Feresin GE, Tapia A, Gutierrez RA *et al.* Free radical scavengers, anti-inflammatory and analgesic activity of *Acaena magellanica*. *J Pharm Pharmacol* 2002; 54: 835–44. doi:10.1211/0022357021779014
17. Chen LH. Studies on process of extracting and separating effective constituent from infructescence of *Platycarya Strobilacea* Sieb. et Zucc. *Northwest Univ* 2006. doi:10.7666/d.y894107 [In Chinese]
18. Wang HP, Chang NQ. Xiangju tablet mainly treat 78 cases of chronic sinusitis. *China J Integr West Med* 2002; 22: 394. doi:10.3321/j.issn:1003-5370.2002.05.028 [In Chinese]

19. Zhu J, Li RJ. Combination of Xiangju tablet and Roxithromycin in the treatment of chronic sinusitis. *Chin J Rural Med Pharm* 2003; 10: 35–6. doi:10.3969/j.issn.1006-5180.2003.06.039 [In Chinese]
20. Lin L. Extraction, isolation and antibacterial activity of flavonoids from the infructescence of *Platycarya Strobilacea* Sieb. et Zucc. *Northwest Univ* 2009. doi:10.7666/d.y1453121 [In Chinese]
21. Liu RQ, Dong QH, Sun XC et al. Xiangju tablet and roerythromycin for chronic side effects observation of the curative effect of 280 cases of sinusitis. *Yunnan J Tradit Chin Med Mater Medica* 2006; 27: 29. doi:10.3969/j.issn.1007-2349.2006.02.030 [In Chinese]
22. Sun JS, Li XH, Wang K et al. Clinical study on Xiangju tablets combined with oxymetazoline hydrochloride spray in treatment of chronic sinusitis. *Drugs Clinic* 2019; 34: 1422–5. doi:10.7501/j.issn.1674-5515.2019.05.034 [In Chinese]
23. Ma WX, Zhong HM. Determination of Astragaloside IV in Xiangju granules by HPLC. *China Pharm* 2014; 23: 45–6. doi:CNKI:SUN:YYGZ.0.2014-15-021 [In Chinese]
24. Jiang Y. Xiangju granules treatment of acute and chronic rhinitis and sinusitis. *J Otolaryngol Ophthalmol Shandong Univ* 1999; 4: 247. doi:CNKI:SUN:SDYU.0.1999-04-042 [In Chinese]
25. Sun CX, Ge D, Wang SM et al. Method improvement for content determination of Astragaloside IV in Xiangju granules and its consistency with the components of original formulation. *China Pharm* 2019; 30: 1914–19. doi:10.6039/j.issn.1001-0408.2019.14.09 [In Chinese]
26. Wang ZH, Zhang DJ, Du GZ et al. Determination of Astragaloside IV in Xiangju granules. *J Changchun Univ Chin Med* 1998; 14: 51. doi:10.13463/j.cnki.cczyy.1998.03.058 [In Chinese]
27. Wang BG. Effect of Xiangju capsule combined with Budesonide nasal spray on allergic rhinitis. *Harbin Med J* 2020; 40: 187–8. doi:CNKI:SUN:HBYY.0.2020-02-047 [In Chinese]
28. Zhang HY. Xiangju capsule combined with moxifloxacin Study on the clinical efficacy and safety of the treatment of sinusitis. *Int Infect Dis* 2020; 9: 106. doi:CNKI:SUN:GJGR.0.2020-02-084 [In Chinese]
29. Shen ZQ. Clinical study on Xiangju capsules combined with eucalyptol limonene and pinene enteric soft capsules for chronic sinusitis. *J New Chin Med* 2020; 52: 130–2. doi:10.13457/j.cnki.jncm.2020.01.037 [In Chinese]
30. Li WB. Clinical observation of Xiangju capsule combined with auricular point pressing in the treatment of chronic sinusitis. *Clin J Chin Med* 2020; 12: 92–93+96. doi:10.3969/j.issn.1674-7860.2020.24.035 [In Chinese]
31. Zhang L. Observation on the efficacy of Xiangju capsule combined with montelukast sodium in the treatment of allergic rhinitis. *J Pract Tradit Chin Med* 2020; 36: 628–9. doi:CNKI:SUN:ZYAO.0.2020-05-058 [In Chinese]
32. Sun JT, Yu Y. Influence of Xiangju capsule on curative effect and serum IgE, IL-4 and IL-12 allergic rhinitis. *J Liaoning Univ Tradit Chin Med* 2015; 17: 176–8. doi:10.13194/j.issn.1673-842x.2015.08.059 [In Chinese]
33. Li BY. Observation on the efficacy of Xiangju capsule in the treatment of upper respiratory tract infection and rhinitis in children. *Res Integr Tradit Chin West Med* 2015; 7: 90–1. doi:CNKI:SUN:ZXYH.0.2015-02-017 [In Chinese]
34. Deng Y, Li X, Shao M et al. GC-MS analysis and antitumor activity in vitro of chemical constituents of essential oil from *Platycarya Strobilacea*. *Guid J Tradit Chin Med Pharm* 2013; 19: 80–2. doi:10.13862/j.cnki.cn43-1446/r.2013.11.054 [In Chinese]
35. Tanaka T, Jiang ZH, Kouno I. Distribution of ellagic acid derivatives and a diarylheptanoid in wood of *Platycarya strobilacea*. *Phytochemistry* 1998; 47: 851–4. doi:10.1016/S0031-9422(97)00670-5
36. Lee JH, Kwon YS, Kim CM. Flavonoids from the stem bark of *Platycarya strobilacea*. *Korean J Pharmacogn* 1998; 29: 353–6.
37. Kim YI, Cho TS, Lee SH. Isolation of anticancer agents from the leaves of *Platycarya strobilacea* S. et Z. *Korean J Pharmacogn* 1996; 27: 238–45.
38. Feng HM, Changjin F, Wensheng D. *Platycarya Strobilacea* Tannin and related compounds. *J Nanjing Forestry Univ* 1989: 56–9. doi:CNKI:SUN:NJLY.0.1989-04-008 [In Chinese]
39. Shi HL, Yang ZF, Li F et al. Experimental study on thin-layer chromatography identification for infructescence of HuaXiangShu and its related questions. *West J Tradit Chin Med* 2013; 26: 36–8. doi:10.3969/j.issn.1004-6852.2013.02.012 [In Chinese]
40. Maeda H, Kakoki N, Ayabe M et al. ent-Eudesmane sesquiterpenoids, galloyl esters of the oak lactone precursor, and a 3-O-methylellagic acid glycoside from the wood of *Platycarya strobilacea*. *Phytochemistry* 2011; 72: 796–803. doi:10.1016/j.phytochem.2011.02.020
41. Morikawa H, Saito Y, Matsuo Y et al. Eudesmane Sesquiterpenoids from the wood of *Platycarya strobilacea*. *Nat Prod Commun* 2016; 11: 905–8. doi:10.1177/1934578X1601100710
42. Luo QY, Xue YJ, Wu XL. Study on the hydrolysate of *Platycarya strobilacea*. *Chem Ind Forest Prod* 1983; 3: 11–6. doi:CNKI:SUN:LCHX.0.1983-03-001 [In Chinese]
43. Yang Y. Determination of ascorbic acid content in *Platycarya longipes* Wu by Spectrophotometry. *J Anhui Agr Sci* 2010; 38: 9523–9524+9526. doi:10.13989/j.cnki.0517-6611.2010.18.169 [In Chinese]
44. Chen K. *Study on Analysis of the Chemical Components from Infructescence of Platycarya strobilacea Sieb. et Zucc.* Xi'an, China: Shaanxi University of Science and Technology, 2008. doi:10.7666/d.y1423367 [In Chinese].
45. Choi YH, Chae SG, Kim JH et al. Isolation of an antifungal compound from aerial parts of *Platycarya strobilacea*. *J Appl Biol Chem* 2003; 46: 131.
46. Zhang L, Wang Y, Xu M. Acid hydrolysis of crude tannins from infructescence of *Platycarya strobilacea* Sieb. et Zucc to produce ellagic acid. *Nat Prod Res* 2014; 28: 1637–40. doi:10.1080/14786419.2014.923998
47. Zhang L, Wang Y, Xu M. In vitro and in vivo antioxidant and antimicrobial activities of extracts from *Platycarya strobilacea* infructescence. *Pak J Pharm Sci* 2017; 30: 747–53.
48. Wang MY, Liu JT, Hou N. Determination of gallic acid in *Platycarya strobilacea* Sieb. et Zucc by RP-HPLC. *China Pharm* 2010; 13: 378–9. doi:CNKI:SUN:ZYSG.0.2010-03-028 [In Chinese]
49. Liu JK, Ying M, Wang Q et al. Content determination of gallic acid in infructescence of *Platycarya Strobilacea*. *China Pharm* 2018; 27: 4–7. doi:CNKI:SUN:YYGZ.0.2018-06-003 [In Chinese]
50. Liu SB, Zhang DG, Jiang YF. *Identification of Common Plants in Western Hunan*. Changsha, China: Hunan Science and Technology Press, 2006. doi:10.3969/j.issn.1006-9690.2002.01.014 [In Chinese].
51. Yang Y, Zhou J, Chen X et al. Determination of gallic acid in *Platycarya longipes*. *Chin J Exp Trad Med Form* 2011; 17: 107–9. doi:10.13422/j.cnki.syfjx.2011.13.050 [In Chinese]
52. Gao R, Chen LH, Li WH et al. Study on ultrasonic extraction process of flavonoids from infructescence of *Platycarya Strobilacea* Sieb. et Zucc. *Chem Eng* 2007; 65–7+73. doi:10.1631/jzus.2007.B0906 [In Chinese]
53. Gao R, Li WH, Liu MX et al. Research on extraction of flavonoid in infructescence of *Platycarya Strobilacea* Sieb. et Zucc. with different distilling methods. *Food Sci* 2007; 28: 230–32. doi:10.3321/j.issn:1002-6630.2007.08.053 [In Chinese]
54. Gao R. *Extraction, Separation, Studies on Extraction and Isolation of Active Ingredients from Platycarya Strobilacea Sieb. et Zucc. as well as Relative Dynamics and its Application*. Shaanxi China: Northwest University, 2009. doi:10.7666/d.y1454090 [In Chinese].
55. Liu MX. *Isolation and Antibacterial Activity of polyphenols from the Infructescence of Platycarya Strobilacea Sieb. et Zucc.* Shaanxi China: Northwest University, 2009. doi:10.7666/d.y1453036 [In Chinese].
56. Liu MX, Li WH, Zhu ZW et al. Optimization for extraction of polyphenol from infructescence of *Platycarya strobilacea* Sieb. et Zucc. by response surface method. *Chin Tradit Pat Med* 2010; 32: 1891–4. doi:CNKI:SUN:ZCYA.0.2010-11-014 [In Chinese]

57. Zhang LL, Xu M, Wang YM *et al.* Optimization of ultrasonic extraction conditions of ellagic acid from infructescence of *Platycarya strobilacea* using response surface method. *Chem Ind Forest Prod* 2011; 31: 19–24. doi:CNKI:SUN:LCHX.0.2011-02-006 [In Chinese]
58. Wang YL, Zhang P, Hu KX *et al.* Alkali extraction and acid precipitation of infructescence of *Platycarya strobilacea* based on PB-CCD design. *Mod Chin Med* 2021; 23: 99–104. doi:10.13313/j. [In Chinese]
59. Xu M, Wang YM, Zhang LL *et al.* Extraction conditions of ellagic tannin from infructescence of *Platycarya strobilacea* using response surface methodology. *Chem Ind Forest Prod* 2013; 33: 71–6. doi:10.3969/j.issn.0253-2417.2013.05.014 [In Chinese]
60. Zhao P, Wang J, Meng QH *et al.* Study on the optimum extracting method and antioxidant of polysaccharide from *Platycarya Strobilacea* Sieb. et Zucc. *Comp and Appl Chem* 2015; 32: 601–4. doi:10.11719/com.app.chem20150518 [In Chinese]
61. Zhang LH, Zhao P, Zhang TT *et al.* Ultrasonic assisted extraction process of polysaccharides from *Platycarya Strobilacea* Sieb. et Zucc Tree. *Herald Med* 2019; 38: 1052–1056. doi:10.3870/j.issn.1004-0781.2019.08.01 [In Chinese]
62. Zhang LL, Wang YM, Xu M. Preparation and antimicrobial activity of tannin polymers from *Platycarya strobilacea* infructescence. *Mater Res Innov* 2014; 18: 10461049. doi:10.1179/1432891714Z.000000000603
63. Liu J, Ying M, Wu B *et al.* Ethanol extract of the infructescence of *Platycarya strobilacea* Sieb. et Zucc. induces methuosis of human nasopharyngeal carcinoma cells. *Evid Based Complement Alternat Med* 2020; 2020: 2760979. doi:10.1155/2020/2760979
64. Zhang L, Wang Y, Xu M. In vitro antitumor activities of *Platycarya strobilacea* Sieb et Zucc infructescence extracts. *Trop J Pharm Res* 2014; 13: 849–54. doi:10.4314/tjpr.v13i6.4
65. Li YP, Mo ZX, Cao LY. Inhibition of infructescence of *Platycarya strobilacea* Sieb. et Zucc on EB virus antigen expression and its cytotoxicity. *Pharm Today* 2014; 24: 93–5. doi:CNKI:SUN:YAXU.0.2014-02-009 [In Chinese]
66. Babu D, Lee JS, Park SY *et al.* Involvement of NF-kappaB in the inhibitory actions of *Platycarya strobilacea* on the TNF-alpha-induced monocyte adhesion to colon epithelial cells and chemokine expression. *Arch Pharm Res* 2008; 31: 727–35. doi:10.1007/s12272-001-1219-0
67. Xu M, Wang YM, Zhang LL *et al.* Purification of polyphenols from *Platycarya strobilacea* and its antioxidant activities. *Bot Res* 2018; 7: 453–62. doi:10.12677/BR.2018.74055 [In Chinese]
68. Tong XL, Li XY, Zhao LH *et al.* Discussion on traditional Chinese medicine prevention and treatment strategies of coronavirus disease 2019 (COVID-19) from the perspective of “Cold-dampness Pesticence”. *J Tradit Chin Med* 2020; 61: 465–470+553. doi:10.13288/j.11-2166/t.2020.06.003 [In Chinese]
69. Dong SY, Jiang ZQ, Meng XH *et al.* A review of Professor Wang Qi’s COVID-19 prevention formula to prevent COVID-19 based on the network pharmacology. *Mod Trad Chin Med Mater Mater-World Sci Tech* 2021; 23: 1063–1075. doi:10.11842/wst.20200825007 [In Chinese]
70. Wang XJ, Zhang WT, Wang MR *et al.* Mechanism of Lianhua Qingwen capsule for the treatment of coronavirus disease 2019 (COVID-19) based on network pharmacology and chemical composition research. *Mod Trad Chin Med Mater Mater-World Sci Tech* 2020; 22: 3169–77. doi:10.11842/wst.20200616005 [In Chinese]
71. Lee JH, Kim H, Shim JH *et al.* Platycarya strobilacea leaf extract inhibits tumor necrosis factor- $\alpha$  production and bone loss induced by Porphyromonas gingivalis-derived lipopolysaccharide. *Arch Oral Biol* 2018; 96: 46–51. doi:10.1016/j.archoralbio.2018.08.011
72. Xiao T, Palida K, Dan YU. Protective effects of polysaccharides from *Platycarya strobilacea* Sieb. et Zucc on cerebral ischemia-reperfusion injury in rat. *Chin J Biochem Pharm* 2017; 37: 6–10. doi:10.3969/j.issn.1005-1678.2017.06.002
73. Smart RC, Huang MT, Chang RL *et al.* Disposition of the naturally occurring antimutagenic plant phenol, ellagic acid, and its synthetic derivatives, 3-O-decylellagic acid and 3, 3'-di-O-methylellagic acid in mice. *Carcinogenesis* 1986; 7: 1663–7. doi:10.1093/carcin/7.10.1663
74. Tanaka T, Kirihara S, Nonaka G *et al.* Tannins and related compounds. CXXIV. Five new ellagitannins, platycaryanins A, B, C, and D, and platycariin, and a new complex tannin, strobilanin, from the fruits and bark of *Platycarya strobilacea* SIEB. et ZUCC., and biomimetic synthesis of C-glycosidic ellagitannins from glucopyranose-based ellagitannins. *Chem Pharm Bull* 1993; 41: 1708–16. doi:10.1248/cpb.41.1708
75. Chen YB, Zhang Y, Chen K. Study on the activity of polysaccharide from infructescence of *Platycarya Strobilacea* Sieb. *Food Sci Tech* 2010; 35: 141–3. doi:10.13684/j.cnki.spkj.2010.02.062 [In Chinese]
